# Supplementary material for: The impact on renal function after long-term use of anticoagulants in atrial fibrillation patients
Source: PubMed Central journal article supplement (PMC8666070; doi:10.1186/s12959-021-00351-1), 2021-12-11

## Supplemental figures

### Supplemental Figure 1.

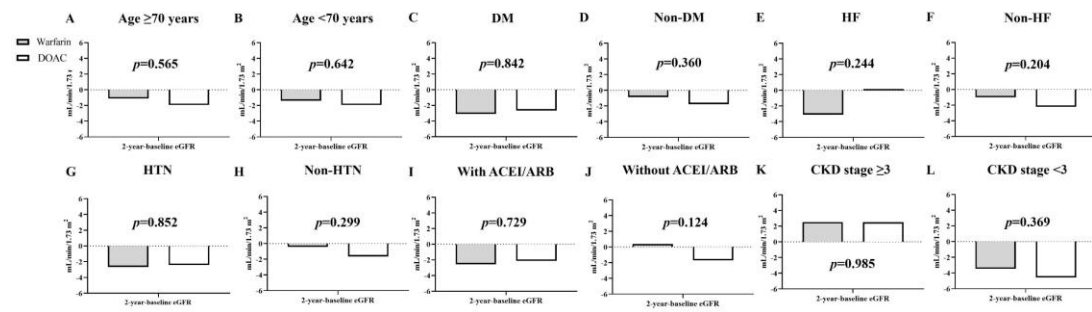

### Supplemental Figure 2.

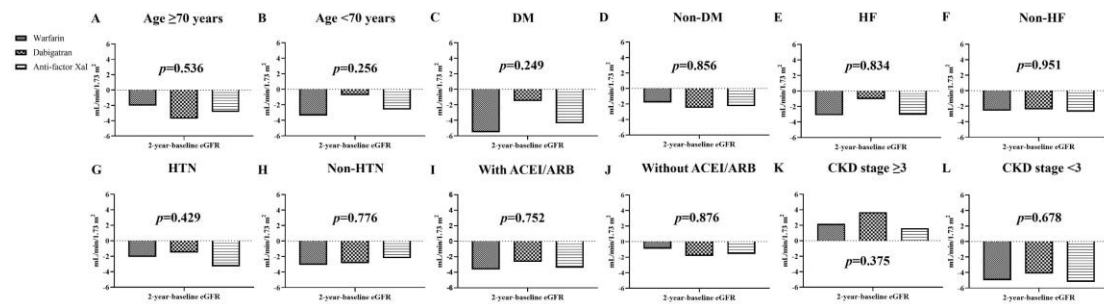

### Supplemental Figure 3.

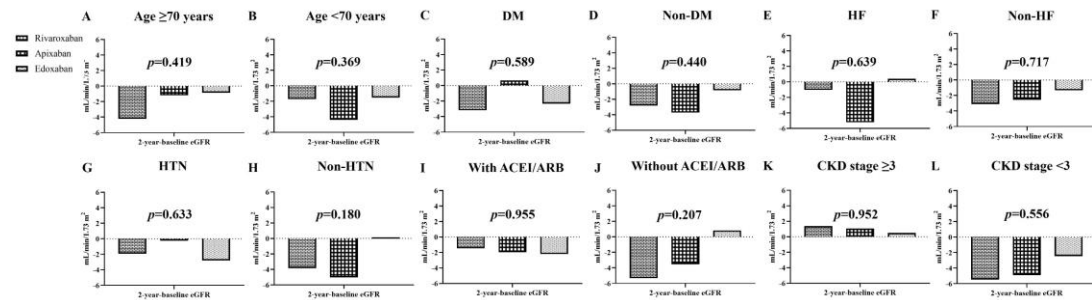

Supplement: 12959_2021_351_MOESM1_ESM.pdf [file 12959_2021_351_MOESM1_ESM.pdf]
